# Supplementary material for: Class switch towards non-inflammatory, spike-specific IgG4 antibodies after repeated SARS-CoV-2 mRNA vaccination
Source: PubMed Central journal article supplement (PMC9847566; doi:10.1126/sciimmunol.ade2798), 2022-12-22
Supplement: sciimmunol.ade2798_sm.pdf [file sciimmunol.ade2798_sm.pdf]

Supplementary Materials for

**Class switch towards non-inflammatory, spike-specific IgG4 antibodies after repeated SARS-CoV-2 mRNA vaccination**

Pascal Irrgang *et al.*

Corresponding author: Kilian Schober, kilian.schober@uk-erlangen.de; Thomas H. Winkler, thomas.winkler@fau.de; Matthias Tenbusch, matthias.tenbusch@fau.de

*Sci. Immunol.* **7**, eade2798 (2022)  
DOI: 10.1126/sciimmunol.ade2798

**The PDF file includes:**

Figs. S1 to S8  
Tables S1 to S4

**Other Supplementary Material for this manuscript includes the following:**

Data file S1  
MDAR Reproducibility Checklist

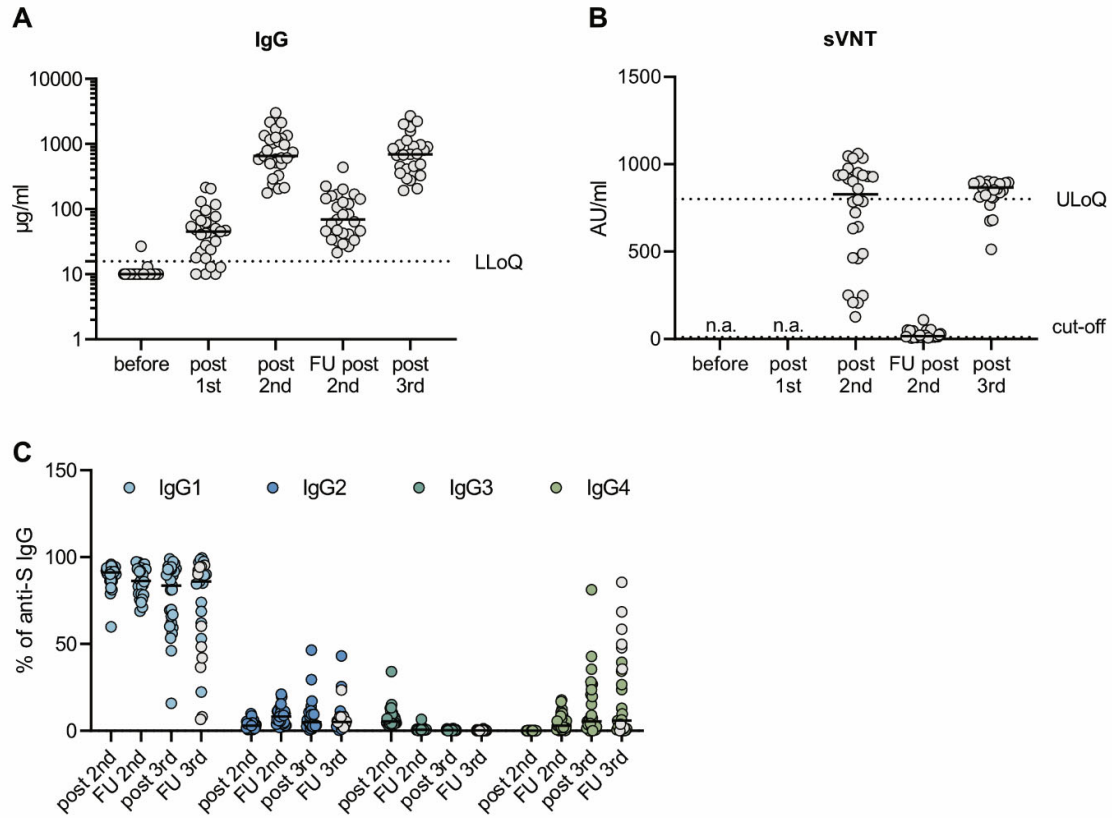

### Figure S1: Longitudinal analyses of vaccine-induced antibody responses

29 volunteers received three doses of the mRNA vaccine Comirnaty as detailed in Table 1. Serum samples were collected at a median of ten days after each vaccination (post 1<sup>st</sup>, post 2<sup>nd</sup>, post 3<sup>rd</sup>) and during a follow-up visit at 210 days after the second vaccination (FU 2<sup>nd</sup>). **(A)** The total amount of spike-specific IgG was quantified by a flow cytometric assay using cell lines expressing full-length spike protein as targets. **(B)** The neutralizing capacity was measured in a fully-automated surrogate virus neutralization assay. The latter was considered as positive within a linear range from 10-800 AU/ml. The dotted line indicates the cut-off value. **(C)** The relative abundance of the different anti-S IgG subclasses is shown for each individual for the indicated time points. Individuals who have experienced a breakthrough infection between the two time points post 3<sup>rd</sup> and FU 3<sup>rd</sup> are indicated by grey dots. Dots represent individual donors with the respective median.

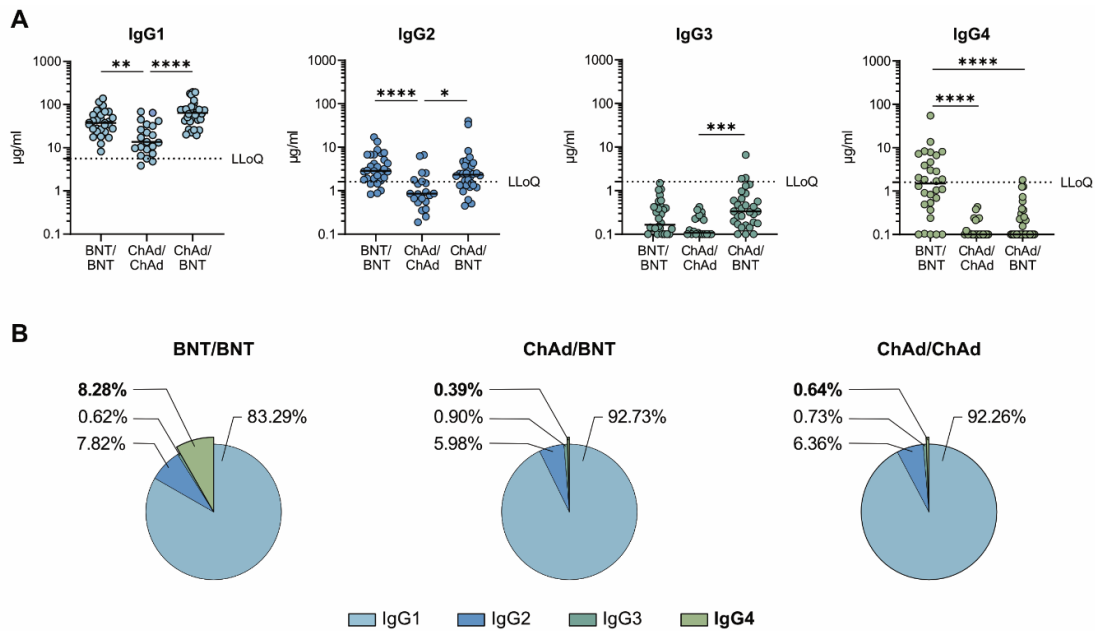

**Figure S2: Comparison of IgG subclass specific antibody responses**

Spike-specific antibody responses were analyzed in 81 individuals around five months after the second vaccination (Supplementary Table 1). 21 individuals had received two doses of the adenoviral vector vaccine (Vaxzevria) 30 had received an initial prime immunization with Vaxzevria followed by a boost with Comirnaty and an additional 30 were vaccinated twice with Comirnaty. **(A)** The different IgG subtypes were quantified by flow cytometry. For visualization purposes, sera with MFI values below the background were set to 0.1 µg/ml. The lowest limit of quantification (LLoQ) is indicated in each graph by a dotted line and represents the lowest detectable amount of the respective standard mAbs (1.56 µg/ml for IgG2, IgG3 and IgG4; 5.6 µg/ml for IgG1). All individual values are depicted by open circles and the median is presented by the line. Kruskal-Wallis followed by Dunn's multiple comparisons test was used for inter group statistics. \* $p < 0.05$ , \*\* $p < 0.01$ , \*\*\* $p < 0.001$ , \*\*\*\* $p < 0.0001$ . **(B)** The proportion of the different IgG subclasses of the total anti-S IgG response is shown for the different vaccination regimens. Depicted are the means of each IgG subclass.

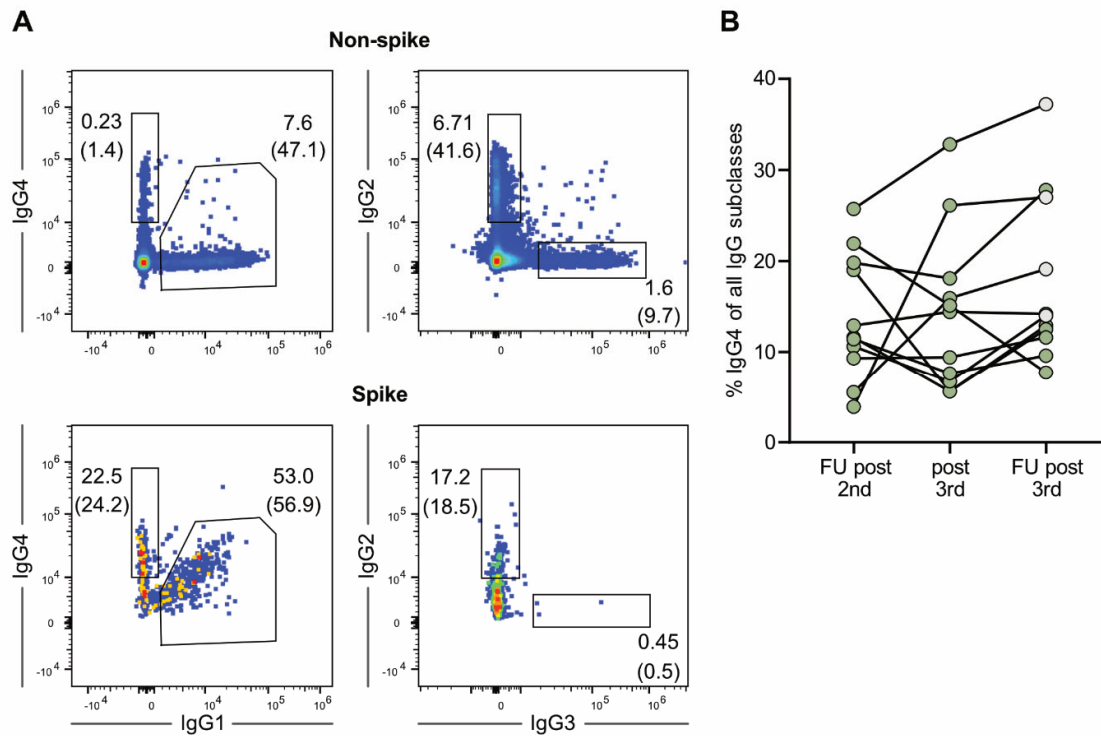

**Figure S3: IgG subclass expression of SARS-CoV-2-specific memory B cells**

**(A)** Flow cytometric analysis of CD19<sup>+</sup>CD27<sup>+</sup> memory B cells. Representative dot plots of memory B cells which do not bind (upper panel) or bind (lower panel) the labelled spike protein (see Fig. 2) are shown for an individual donor. Surface expression of different IgG subclasses (IgG1 vs. IgG4 and IgG2 vs. IgG3) was determined and percentages of positive cells are indicated next to the gates. Since IgA<sup>+</sup> and IgM<sup>+</sup> B-cells are also present in the CD19<sup>+</sup>CD27<sup>+</sup> memory compartment, the percentages of the respective IgG subclass among the sum of all IgG subclasses are also indicated in parentheses. **(B)** Longitudinal analysis of IgG4 subclass contribution of spike-binding memory B cells. Individuals that had experienced a breakthrough infection in the time frame between post 3rd and FU 3rd are indicated by grey circles.

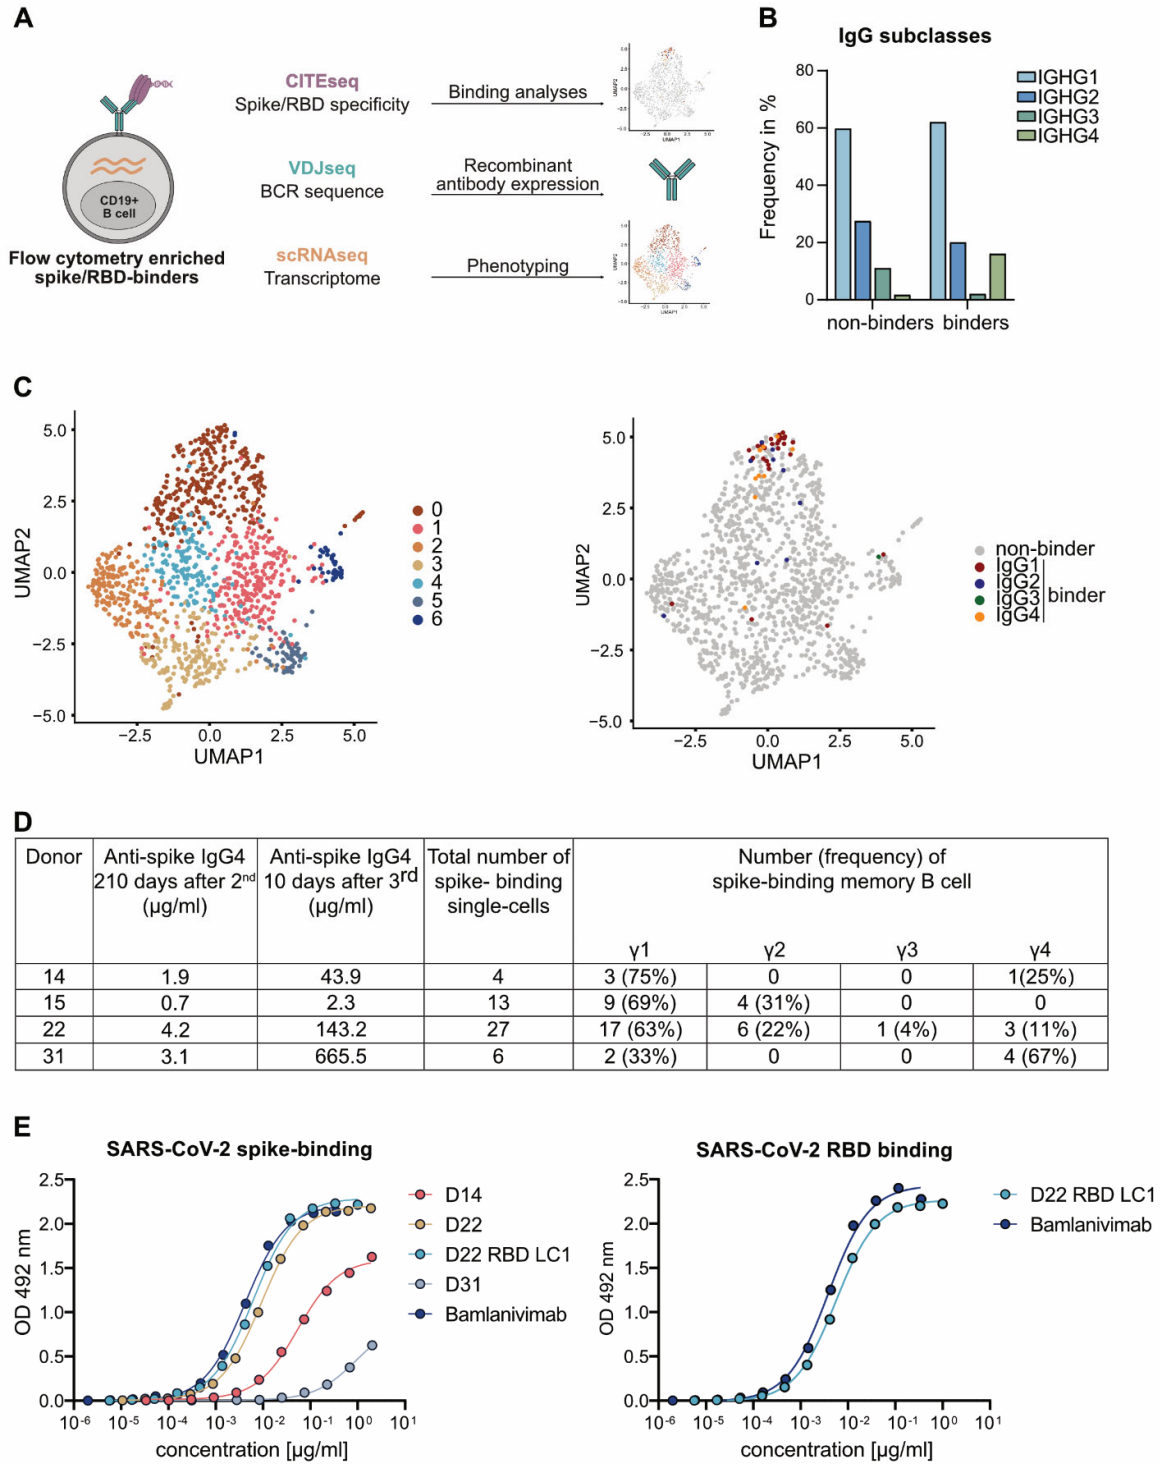

**Figure S4: Single-cell RNA, CITE and VDJ sequencing of spike-binding memory B cells**

(A) Experimental design for scRNA-seq data generation including CITE-seq and BCR-VDJseq. (B) Frequency distribution of IgG subclasses obtained from scRNA dataset.

Samples from four individual donors and two time points (210 days post 2<sup>nd</sup> and 10 days post 3<sup>rd</sup> vaccination) were analyzed in parallel using hashtag-technology. Aggregate isotype frequencies of spike binders (n=50) and non-binders (n=1004) are shown. **(C)** UMAP visualization of all CD19<sup>+</sup> IgG<sup>+</sup> sorted cells (1004 non-binders and 50 spike-binders) from all four donors and two time points that passed quality control. The cells are represented in seven main clusters (left). Spike binders were projected to the UMAP visualization with different colors depicting different subclasses (right). **(D)** The table shows the anti-S IgG4 levels and the number of spike-binding memory B-cells for the four selected donors. **(E)** Characteristics of the produced recombinant antibodies derived from scRNA-seq data from mRNA vaccinees. Heavy and light chain sequence information were extracted from four IgG4 spike-binding cells obtained from scRNA-seq. ELISA binding curve to SARS-CoV-2 protein (left) or ELISA binding curve to RBD peptide (right). The therapeutic SARS-CoV-2-specific monoclonal antibody bamlanivimab was used as positive control.

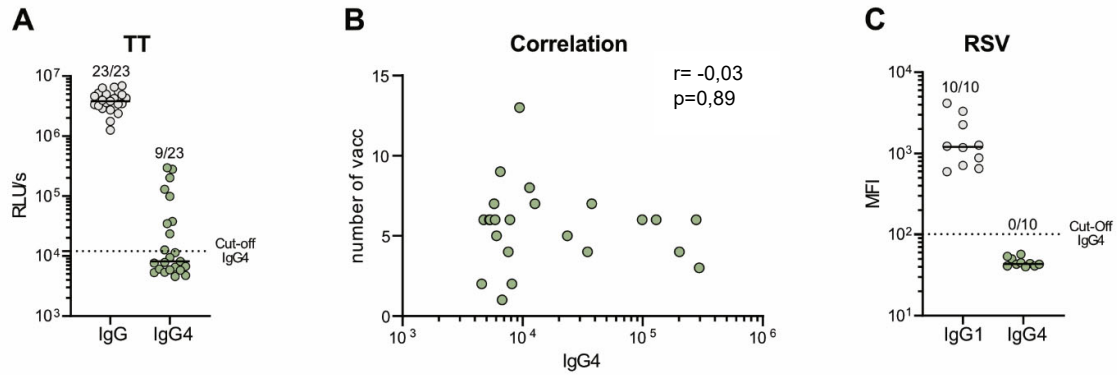

**Figure S5: IgG4 antibody response to tetanus vaccinations or RSV infections**

(A) In 23 individuals with a history of multiple vaccination against tetanus toxoid (see Table S3), TT-specific IgG and IgG4 antibodies were analyzed by ELISA. (B) A non-parametric correlation was computed for the individuals IgG4 levels and the number of vaccine doses. The Spearman correlation coefficient and the p-value are shown. (C) Using our FACS-based antibody assay with RSV-F protein expressing cells, RSV-specific IgG1 and IgG4 antibodies were measured in ten randomly selected sera of cohort 2. Dots represent individual sera with respective median. Number of positive sera are indicated for each analysis.

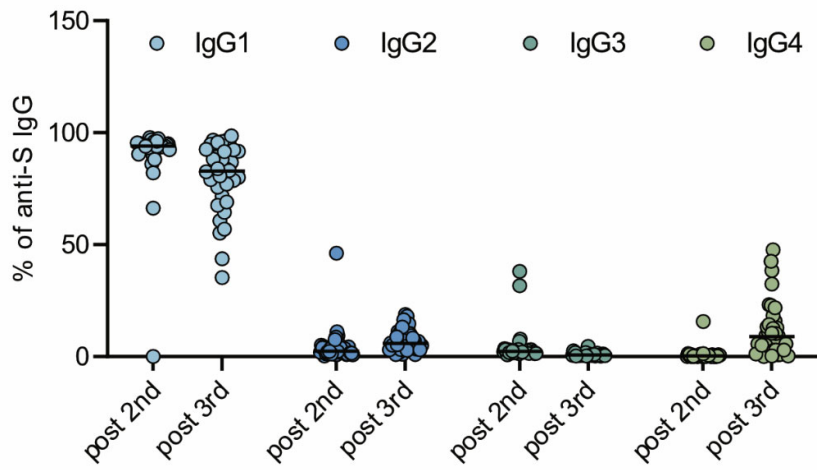

**Figure S6: Relative abundance of IgG subclasses in cohort 2**

The relative abundance of the different anti-S IgG subclasses is shown for each of the 38 individuals of cohort 2 ten days after second (post 2<sup>nd</sup>) and third (post 3<sup>rd</sup>) immunization.



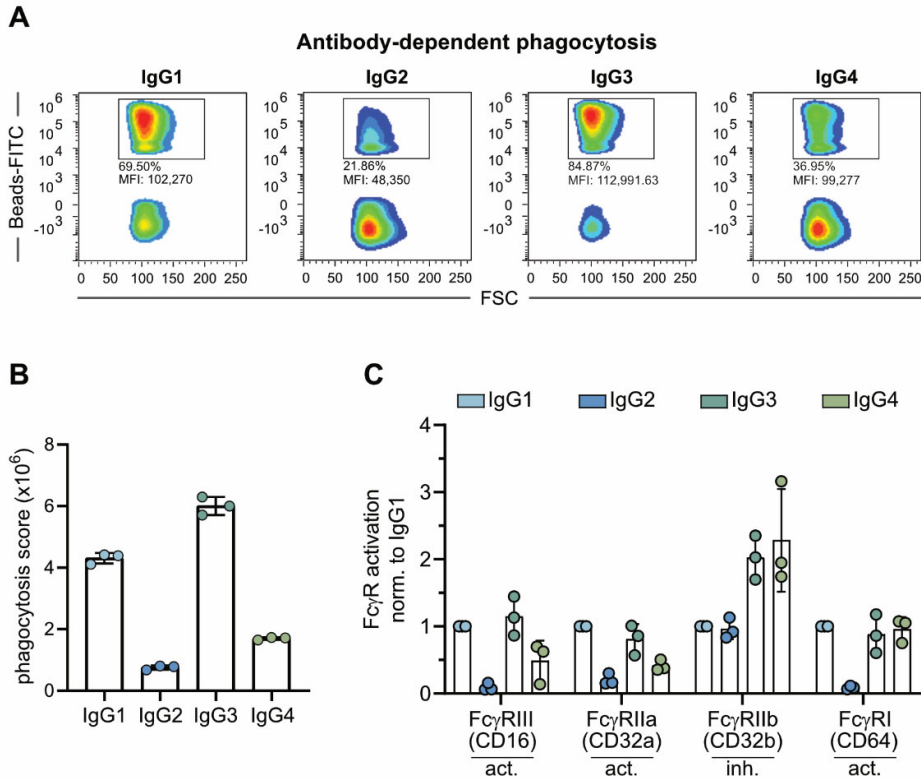

**Figure S7: Antibody-dependent phagocytosis and FcγR reporter assays**

(A) Representative plots for IgG-mediated phagocytosis of spike-loaded microbeads by THP-1 cells are shown for the monoclonal RBD antibodies of the different subclasses (IgG1, IgG2, IgG3, IgG4). (B) The phagocytic scores were quantified for each monoclonal antibody. (C) Using a panel of FcγR reporter cells, the monoclonal RBD antibodies were analyzed for their potential to activate the different human FcR receptors CD16A, CD32A, CD32B and CD64. The level of IL-2 as a measure of the respective FcγR activation was first normalized to the total amount of spike-binding antibodies. Furthermore, the activation of the different FcγR by the IgG2, IgG3 and IgG4 isotypes were normalized to the respective activation by the IgG1 mAb. Dots represent each independent experiment (n=3).

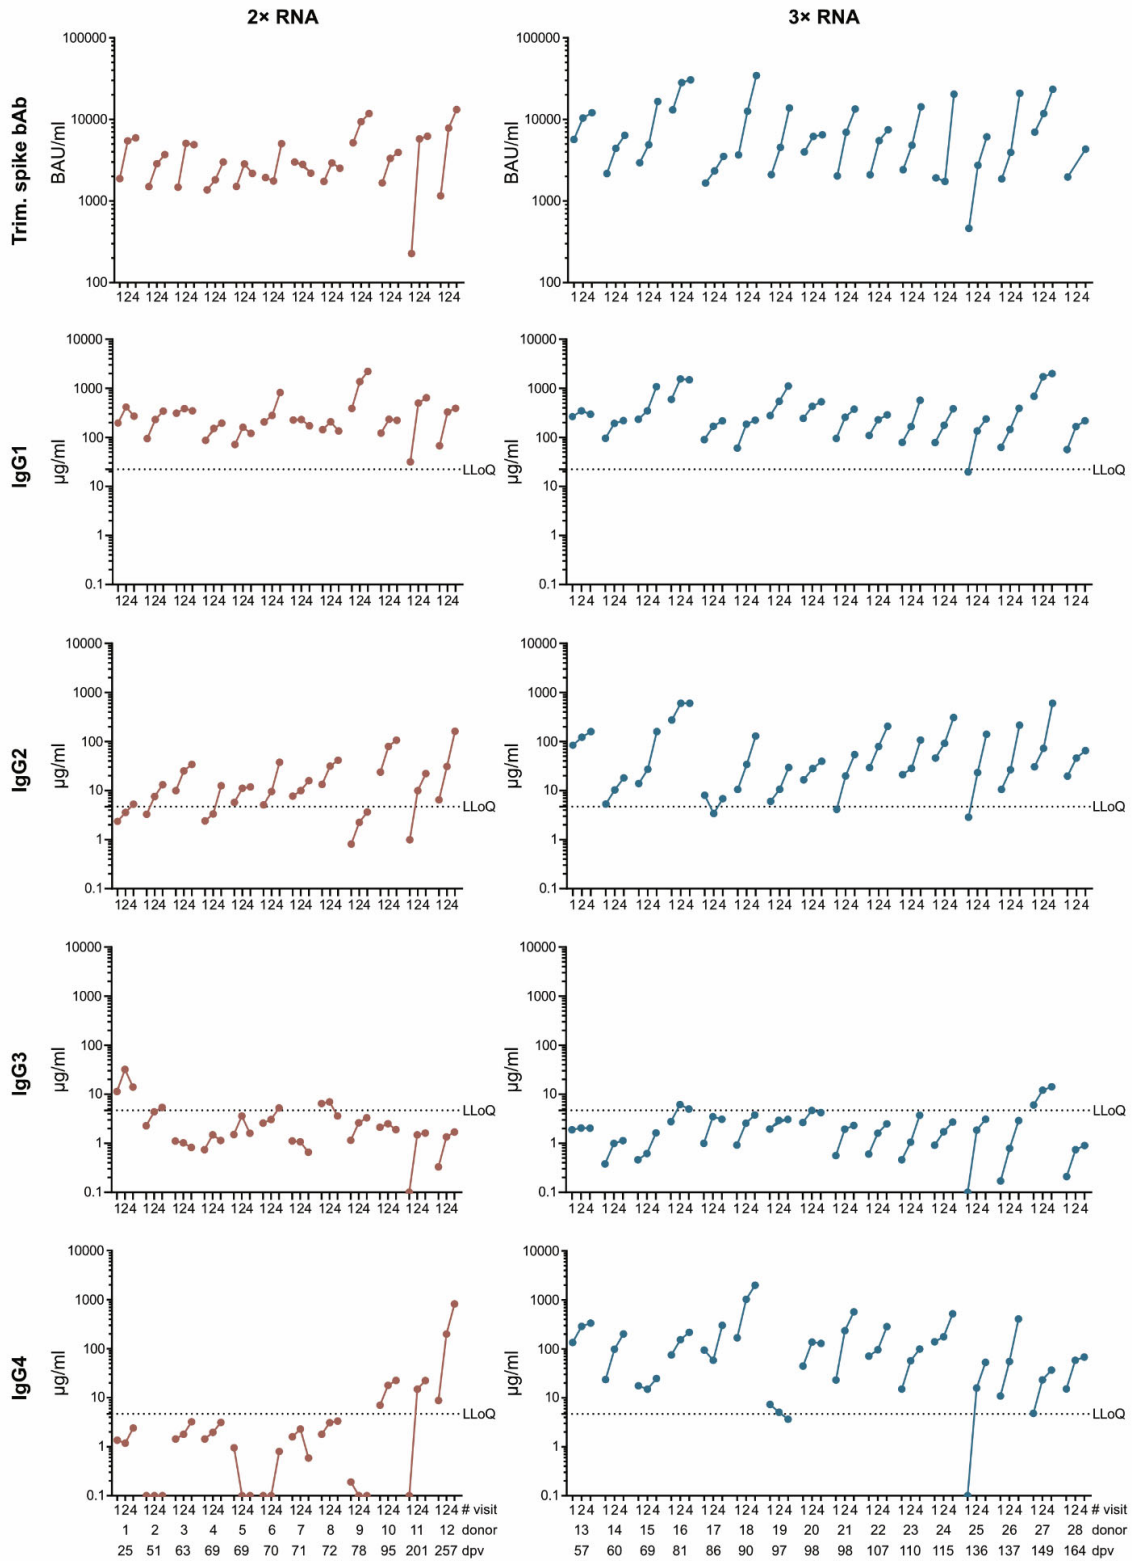

**Figure S8: Anamnestic antibody responses after breakthrough infections**

In individuals with PCR-confirmed SARS-CoV-2 breakthrough infection (see Table S4), anamnestic antibody responses were quantified at the time point of study inclusion (V1,

typically one week after PCR) as well as two (V2) and four weeks (V4) after the PCR result. Anamnestic responses in individuals experiencing infection after two (left panels) or three (right panels) immunizations were compared. Individuals are ordered from left to right based on increasing time difference between last vaccination and breakthrough infection. Trimeric spike-binding IgG antibodies were analyzed in fully automated CLIA assay (LIAISON®SARS-CoV-2 TrimericS IgG assay). Antibody levels were quantified according to the WHO International Reference standard and listed as BAU/ml. The levels of anti-spike IgG1, IgG2, IgG3 and IgG4 were quantified by flow cytometry. The lowest limit of quantification (LLoQ) is indicated in each graph by a dotted line and represents the lowest detectable amount of the respective standard mAbs (4.68 µg/ml for IgG2, IgG3 and IgG4; 22.4 µg/ml for IgG1). Individual responses were indicated by dots with a connecting line.

**Table S1:** Characteristics of study cohort comparing homologous vs. heterologous vaccination

|                                                                                   | Het-Imm (Erlangen) <sup>37</sup> |                                    |                             |
|-----------------------------------------------------------------------------------|----------------------------------|------------------------------------|-----------------------------|
| prime boost                                                                       | BNT162b2<br>BNT162b2             | ChAdOx1 nCoV-19<br>ChAdOx1 nCoV-19 | ChAdOx1 nCoV-19<br>BNT162b2 |
| Number of volunteers                                                              | n = 30                           | n = 21                             | n = 30                      |
| Age in years, median (IQR) [range]                                                | 47 (32-54) [24-60]               | 45 (40-55) [31-59]                 | 46 (33-54) [21-59]          |
| Sex, n (%) Female                                                                 | 15 (50 %)                        | 15 (71.4 %)                        | 15 (50 %)                   |
| Sex, n (%) Male                                                                   | 15 (50 %)                        | 6 (28.6 %)                         | 15 (50 %)                   |
| Time intervals between immunizations in days, median (IQR) [range]                | 23 (22-25) [18-28]               | 63 (63-63) [63-63]                 | 63 (63-63) [63-63]          |
| Time interval from immunization to blood collection in days, median (IQR) [range] | 155 (153-164) [148-177]          | 142 (141-144) [140-144]            | 142 (142-144) [141-144]     |
| Overlap with Cohort 2                                                             | 8                                | 0                                  | 0                           |

**Table S2: Relative proportion of IgG subclasses among spike and non-spike binding cells switched memory B-cells**

| Donor | Time point | CD27 <sup>+</sup> spike <sup>neg</sup> |        |        |        |        | CD27 <sup>+</sup> spike <sup>pos</sup> |        |        |        |        | Anti-S IgG4 |      |
|-------|------------|----------------------------------------|--------|--------|--------|--------|----------------------------------------|--------|--------|--------|--------|-------------|------|
|       |            | No. of cells                           | % IgG1 | % IgG2 | % IgG3 | % IgG4 | No. of cells                           | % IgG1 | % IgG2 | % IgG3 | % IgG4 | µg/ml       | %**  |
| A6    | FU 2nd     | 19676                                  | 58.9   | 27.4   | 11.2   | 2.4    | 521                                    | 60.0   | 15.4   | 5.7    | 19.0   | 1.36        | 2.9  |
|       | post 3rd   | 15186                                  | 62.9   | 22.6   | 11.3   | 3.1    | 999                                    | 77.1   | 14.0   | 3.3    | 5.6    | 18.25       | 5.4  |
|       | FU 3rd     | 15368                                  | 55.5   | 30.6   | 11.4   | 2.4    | 568                                    | 56.8   | 27.3   | 3.1    | 12.9   | 1.42        | 4.1  |
| A9    | FU 2nd     | 11335                                  | 57.4   | 29.3   | 6.5    | 6.9    | 550                                    | 74.1   | 9.8    | 4.5    | 11.6   | 0.2         | 0.3  |
|       | post 3rd   | 9038                                   | 34.5   | 57.0   | 6.4    | 2.1    | 378                                    | 78.2   | 13.2   | 3.0    | 5.6    | 7.5         | 2.2  |
|       | FU 3rd     | 8246                                   | 62.9   | 29.3   | 5.4    | 2.4    | 464                                    | 64.2   | 22.0   | 1.3    | 12.5   | 0.21        | 0.3  |
| A11*  | FU 2nd     | 20668                                  | 69.0   | 20.7   | 6.7    | 3.7    | 433                                    | 69.7   | 23.6   | 1.2    | 5.5    | 2.96        | 12.3 |
|       | post 3rd   | 28089                                  | 79.5   | 8.1    | 3.5    | 8.9    | 796                                    | 68.5   | 13.7   | 1.9    | 15.9   | 208.72      | 35.5 |
|       | FU 3rd     | 9279                                   | 65.8   | 23.8   | 8.6    | 1.8    | 614                                    | 52.6   | 27.5   | 0.8    | 19.1   | 170.31      | 47.8 |
| A13*  | FU 2nd     | 11086                                  | 67.7   | 26.6   | 4.0    | 1.7    | 379                                    | 61.4   | 27.2   | 0.8    | 10.6   | 0.18        | 0.7  |
|       | post 3rd   | 3265                                   | 69.8   | 22.2   | 7.1    | 0.9    | 493                                    | 57.4   | 30.0   | 5.9    | 6.7    | 16.62       | 3.6  |
|       | FU 3rd     | 10636                                  | 63.4   | 25.8   | 9.9    | 0.9    | 520                                    | 59.8   | 23.5   | 2.7    | 14.0   | 20.34       | 3.8  |
| A16   | FU 2nd     | 16868                                  | 57.5   | 29.6   | 10.7   | 2.2    | 356                                    | 67.1   | 19.4   | 0.6    | 12.9   | 0.21        | 2.6  |
|       | post 3rd   | 19063                                  | 58.9   | 31.0   | 7.9    | 2.2    | 626                                    | 65.0   | 19.8   | 0.9    | 14.4   | 30.9        | 15.2 |
|       | FU 3rd     | 14097                                  | 67.4   | 19.7   | 10.0   | 2.9    | 461                                    | 43.5   | 41.8   | 0.4    | 14.2   | 16.62       | 23.7 |
| A17   | FU 2nd     | 15390                                  | 79.0   | 15.5   | 4.8    | 0.7    | 203                                    | 69.9   | 17.7   | 1.0    | 11.4   | 0.13        | 0.6  |
|       | post 3rd   | 18070                                  | 77.9   | 16.8   | 4.9    | 0.3    | 706                                    | 73.3   | 18.4   | 0.7    | 7.6    | 13.27       | 1.6  |
|       | FU 3rd     | 10842                                  | 58.2   | 30.0   | 10.7   | 1.2    | 414                                    | 55.2   | 34.3   | 0.9    | 9.6    | 2.25        | 1.1  |
| A18   | FU 2nd     | 12577                                  | 23.0   | 72.2   | 3.6    | 1.2    | 32                                     | 46.5   | 31.7   | 0.0    | 21.9   | 0.62        | 3.1  |
|       | post 3rd   | 12897                                  | 21.2   | 75.5   | 2.7    | 0.6    | 119                                    | 49.4   | 31.9   | 3.6    | 15.1   | 5.92        | 2.7  |
|       | FU 3rd     | 10738                                  | 28.5   | 66.8   | 3.6    | 1.1    | 45                                     | 30.9   | 59.5   | 1.9    | 7.7    | 0.1         | 0.9  |
| A19   | FU 2nd     | 17186                                  | 53.9   | 26.3   | 18.0   | 1.8    | 252                                    | 59.1   | 20.7   | 0.4    | 19.8   | 1.19        | 5.7  |
|       | post 3rd   | 28813                                  | 52.3   | 33.2   | 13.4   | 1.1    | 750                                    | 57.1   | 22.7   | 2.1    | 18.1   | 60.11       | 26.8 |
|       | FU 3rd     | 18797                                  | 47.7   | 37.9   | 12.9   | 1.4    | 297                                    | 47.5   | 22.9   | 1.8    | 27.8   | 14.24       | 39.4 |
| A24   | FU 2nd     | 34464                                  | 40.5   | 50.1   | 8.2    | 1.1    | 902                                    | 71.4   | 14.7   | 4.5    | 9.3    | 3.33        | 9.8  |
|       | post 3rd   | 34779                                  | 42.8   | 46.7   | 9.5    | 0.9    | 1634                                   | 73.0   | 14.4   | 3.2    | 9.4    | 19.91       | 8.9  |
|       | FU 3rd     | 31946                                  | 43.9   | 46.0   | 9.0    | 1.1    | 1206                                   | 71.7   | 14.5   | 2.2    | 11.6   | 0.97        | 2.4  |
| A28*  | FU 2nd     | 25061                                  | 61.7   | 27.9   | 8.6    | 1.8    | 295                                    | 55.4   | 15.9   | 2.9    | 25.7   | 1.95        | 8.5  |
|       | post 3rd   | 23794                                  | 63.8   | 24.8   | 10.1   | 1.3    | 1066                                   | 24.2   | 42.6   | 0.4    | 32.8   | 0.1         | 0.2  |
|       | FU 3rd     | 22215                                  | 60.9   | 27.6   | 10.2   | 1.2    | 606                                    | 26.7   | 35.3   | 0.7    | 37.2   | 634.03      | 68.4 |
| A29*  | FU 2nd     | 9117                                   | 50.8   | 41.2   | 6.1    | 2.0    | 109                                    | 72.7   | 21.1   | 2.3    | 3.9    | 1.32        | 5.6  |
|       | post 3rd   | 20902                                  | 50.2   | 39.8   | 7.8    | 2.2    | 661                                    | 49.0   | 23.7   | 1.2    | 26.1   | 95.21       | 23.7 |
|       | FU 3rd     | 16787                                  | 50.2   | 40.3   | 7.5    | 2.0    | 724                                    | 55.3   | 17.4   | 0.3    | 27.0   | 362.78      | 49.8 |

\* had breakthrough infection in the time interval between post 3rd and FU 3rd

\*\* percentage of sum of all IgG subclasses

**Table S3:** Cohort with history of TT vaccinations

| <b>Donor</b> | <b>Years since last dose</b> | <b># of vaccine doses</b> |
|--------------|------------------------------|---------------------------|
| U001         | 10                           | 9                         |
| U002         | 7                            | 6                         |
| U003         | 8                            | 7                         |
| U004         | 7                            | 4                         |
| U005         | 1                            | 8                         |
| U006         | 7                            | 5                         |
| U007         | 0.2                          | 2                         |
| U008         | 10                           | 7                         |
| U009         | 6                            | 2                         |
| U010         | 4                            | 13                        |
| U011         | 10                           | 4                         |
| U012         | 6                            | 6                         |
| U013         | 4.5                          | 6                         |
| U014         | 5                            | 1                         |
| U015         | 7                            | 4                         |
| U016         | 4                            | 7                         |
| U017         | 4                            | 6                         |
| U018         | 2                            | 5                         |
| U019         | 1                            | 6                         |
| U020         | 6                            | 6                         |
| U021         | 6                            | 3                         |
| U022         | 2                            | 6                         |
| U023         | 5                            | 6                         |

**Table S4:** Characteristics of cohort (CoVaKo study) with breakthrough infections after two or three mRNA vaccine immunizations

| ID | Sex    | Age (years) | Vaccines | VOC          | Time span between last immunization and infection (days) |
|----|--------|-------------|----------|--------------|----------------------------------------------------------|
| 1  | female | 54          | BB       | Delta        | 25                                                       |
| 2  | female | 33          | BB       | Delta        | 51                                                       |
| 3  | female | 51          | BB       | Alpha        | 63                                                       |
| 4  | male   | 31          | BB       | Delta        | 69                                                       |
| 5  | female | 31          | BB       | Delta        | 69                                                       |
| 6  | male   | 28          | BB       | Omicron BA.2 | 70                                                       |
| 7  | male   | 52          | BB       | Delta        | 71                                                       |
| 8  | male   | 24          | BB       | Delta        | 72                                                       |
| 9  | female | 30          | BB       | Omicron BA.2 | 78                                                       |
| 10 | female | 58          | BB       | Alpha        | 95                                                       |
| 11 | female | 38          | BB       | Omicron BA.2 | 201                                                      |
| 12 | female | 42          | BB       | Delta        | 257                                                      |
|    |        |             |          |              |                                                          |
| 13 | female | 36          | BBM      | Omicron BA.1 | 57                                                       |
| 14 | male   | 19          | BBB      | Omicron BA.2 | 60                                                       |
| 15 | female | 38          | BBM      | Omicron BA.1 | 69                                                       |
| 16 | female | 39          | BBB      | Omicron BA.1 | 81                                                       |
| 17 | male   | 41          | BBB      | Omicron BA.1 | 86                                                       |
| 18 | male   | 39          | BBB      | Omicron BA.1 | 90                                                       |
| 19 | male   | 66          | BBB      | Omicron BA.1 | 97                                                       |
| 20 | female | 22          | BBB      | Omicron BA.2 | 98                                                       |
| 21 | male   | 25          | BBB      | Omicron BA.2 | 98                                                       |
| 22 | female | 28          | BBB      | Omicron BA.2 | 107                                                      |
| 23 | male   | 43          | BBM      | Omicron BA.2 | 110                                                      |
| 24 | female | 62          | BBM      | Omicron BA.2 | 115                                                      |
| 25 | female | 41          | BBB      | Omicron BA.2 | 136                                                      |
| 26 | female | 39          | BBB      | Omicron BA.2 | 137                                                      |
| 27 | male   | 53          | BBB      | Omicron BA.2 | 149                                                      |
| 28 | male   | 59          | BBB      | Omicron BA.2 | 164                                                      |

B= BioNTech/Pfizer; M= Moderna
